# Supplementary material for: Cytotoxic Activity against A549 Human Lung Cancer Cells and ADMET Analysis of New Pyrazole Derivatives
Source: MDPI journal article supplement (doi:10.3390/ijms22136692), 2021-06-22
Supplement: s1 [file s1]

## Article

# Cytotoxic activity against A549 human lung cancer cells and ADMET analysis of new pyrazole derivatives

Agnieszka Czyłkowska <sup>1,\*</sup>, Małgorzata Szczesio <sup>1</sup>, Anita Raducka <sup>1</sup>, Bartłomiej Rogalewicz <sup>1</sup>, Paweł Kręcisz <sup>2</sup>, Kamila Czarnecka <sup>2,3</sup>, Paweł Szymański <sup>2,3</sup>, Monika Pitucha <sup>4</sup>, and Tomasz Pawlak <sup>5</sup>

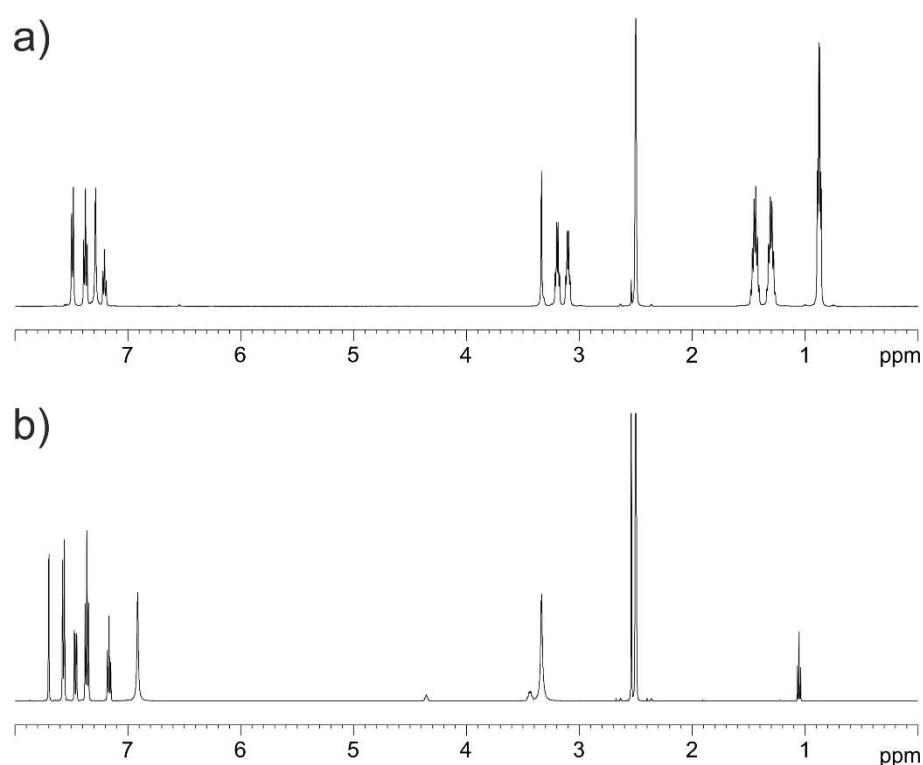

Figure S1. Solution-state <sup>1</sup>H NMR (DMSO-d<sub>6</sub>) of 1 (a) and 2 (b).

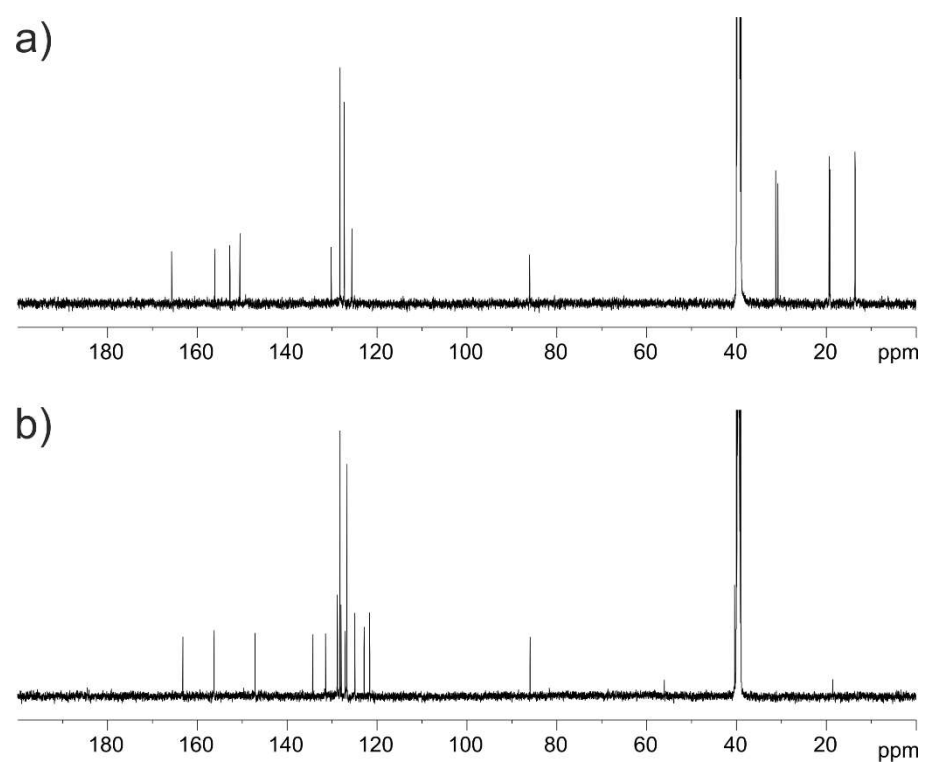

**Figure S2.** Solution-state  $^{13}\text{C}$  NMR (DMSO- $d_6$ ) of **1** (a) and **2** (b).
